# Supplementary material for: Win ratio analysis of clinical outcomes of focal therapy and robot-assisted radical prostatectomy for the patients with localized prostate cancer
Source: Research Square preprint supplement (doi:10.21203/rs.3.rs-3966941/v1), 2024-03-13
Supplement: Supplementary file 1 [file c99f890a214e7ef329af219f.docx]

**Supplementary Materials**

**Tables**

**Supplementary Table 1. Summary statistics of EPIC urinary function scores**

| **Month** | **RARP group** | **FT group** | **p-value *** |
| --- | --- | --- | --- |
| 0 | 95.8 (87.5–100.0) | 93.8 (87.5–97.9) | 0.1092 |
|  | 91.60±9.34 | 90.27±12.80 |  |
| 1 | 56.3 (46.5–63.9) | 79.2 (58.0–88.9) | <0.0001 |
|  | 54.68±14.02 | 71.78±22.99 |  |
| 3 | 69.2 (57.7–81.3) | 93.8 (83.7–97.9) | <0.0001 |
|  | 68.32±16.39 | 88.16±13.93 |  |
| 6 | 80.1 (71.6–91.0) | 95.8 (87.2–100.0) | <0.0001 |
|  | 79.05±15.08 | 92.09±9.92 |  |
| 9 ** | – | 97.9 (91.7–100.0) | － |
|  | – | 93.72±9.30 | － |
| 12 | 84.4 (74.7–94.5) | 97.9 (92.4–100.0) | <0.0001 |
|  | 82.10±14.48 | 94.30±9.44 |  |
| Top: median (interquartile range [IQR]), bottom: mean ± standard deviation (SD) shown.  * p-value from Wilcoxon rank sum test.  ** At 9 months post-treatment, Expanded Prostate Cancer Index Composite (EPIC) scores are measured only for the FT group. | | | |

**Supplementary Table 2. Summary statistics of EPIC urinary function scores (Subgroups by D’Amico risk classification)**

|  | **Low risk** | |  | **Intermediate risk** | |  | **High risk** | |
| --- | --- | --- | --- | --- | --- | --- | --- | --- |
| **Month** | **RARP group** | **FT group** |  | **RARP group** | **FT group** |  | **RARP group** | **FT group** |
| 0 | 97.9 (79.2–100.0) | 95.8 (87.5–97.9) |  | 95.6 (89.6–100.0) | 92.1 (85.6–95.8) |  | 97.9 (93.8–100.0) | 97.9 (95.8–100.0) |
|  | 89.77±14.70 | 92.29±8.66 |  | 93.22±7.35 | 88.04±14.58 |  | 94.58±7.88 | 97.87±2.37 |
| 1 | 39.6 (33.3–66.0) | 75.0 (43.8–87.5) |  | 58.3 (51.8–63.9) | 77.8 (59.1–88.9) |  | 48.6 (47.2–58.3) | 85.4 (79.2–93.2) |
|  | 47.71±18.06 | 66.10±25.34 |  | 57.01±12.32 | 71.20±23.07 |  | 51.38±12.10 | 85.51±11.38 |
| 3 | 61.2 (50.0–75.8) | 97.9 (93.8–100.0) |  | 70.8 (60.0–82.0) | 89.3 (76.4–95.8) |  | 69.6 (57.0–82.0) | 100.0 (95.5–100.0) |
|  | 61.13±17.32 | 94.81±6.59 |  | 70.33±15.80 | 84.45±15.37 |  | 69.09±16.99 | 94.56±9.34 |
| 6 | 77.1 (65.1–91.7) | 97.9 (93.8–97.9) |  | 80.1 (73.2–90.0) | 93.8 (86.8–100.0) |  | 84.1 (73.7–84.8) | 100.0 (95.8–100.0) |
|  | 75.92±18.91 | 92.40±9.67 |  | 79.97±13.79 | 90.89±10.55 |  | 78.92±17.70 | 97.61±4.27 |
| 9 * | – | 97.9 (95.8–100.0) |  | – | 93.8 (89.6–100.0) |  | – | 100.0 (97.9–100.0) |
|  | – | 95.55±8.17 |  | – | 92.28±10.13 |  | – | 97.45±4.97 |
| 12 | 77.8 (59.1–91.7) | 97.9 (93.8–100.0) |  | 85.5 (75.8–95.5) | 97.8 (91.7–100.0) |  | 86.2 (70.2–87.9) | 100.0 (95.8–100.0) |
|  | 76.61±18.26 | 95.06±7.80 |  | 84.06±12.73 | 93.89±10.09 |  | 78.17±17.50 | 94.98±9.74 |
| Top: median (interquartile range [IQR]), bottom: mean ± standard deviation (SD) shown.  * At 9 months post-treatment, Expanded Prostate Cancer Index Composite (EPIC) scores are measured only for the FT group. | | | | | | | | |

**Supplementary Table 3. Summary statistics of EPIC urinary function scores (Subgroups by Age classification)**

|  | **Age < 70** | |  | **Age ≧70** | |
| --- | --- | --- | --- | --- | --- |
| **Month** | **RARP group** | **FT group** |  | **RARP group** | **FT group** |
| 0 | 95.8 (91.7–100.0) | 93.8 (88.5–97.9) |  | 93.8 (82.7–100.0) | 90.8 (87.5–97.9) |
|  | 93.90±8.86 | 90.23±13.17 |  | 91.07±9.78 | 90.31±12.60 |
| 1 | 57.0 (43.8–64.6) | 68.1 (46.9–87.5) |  | 54.8 (48.6–61.8) | 83.3 (65.0–91.7) |
|  | 54.47±15.25 | 66.43±25.65 |  | 54.93±12.64 | 77.13±18.84 |
| 3 | 70.2 (59.7–83.3) | 95.8 (84.4–99.0) |  | 68.8 (54.8–75.8) | 89.6 (83.7–97.9) |
|  | 69.73±17.11 | 88.27±15.76 |  | 66.66±15.60 | 88.05±12.05 |
| 6 | 80.6 (73.6–93.1) | 96.9 (85.1–100.0) |  | 77.8 (71.5–87.5) | 95.8 (88.2–100.0) |
|  | 80.58±15.19 | 91.84±10.58 |  | 77.25±14.98 | 92.33±9.36 |
| 9 * | – | 97.9 (92.4–100.0) |  | – | 95.8 (91.7–100.0) |
|  | – | 93.89±10.08 |  | – | 93.54±8.56 |
| 12 | 87.5 (77.8–95.5) | 97.9 (93.8–100.0) |  | 79.9 (70.2–93.8) | 96.9 (91.7–100.0) |
|  | 83.60±14.94 | 94.33±11.16 |  | 80.34±13.94 | 94.27±7.51 |
| Top: median (interquartile range [IQR]), bottom: mean ±standard deviation (SD) shown.  * At 9 months post-treatment, Expanded Prostate Cancer Index Composite (EPIC) scores are measured only for the FT group. | | | | | |

**Figures**

**Supplementary Figure 1. Kaplan-Meier curves for failure-free survival (Subgroups by D’Amico risk classification)**


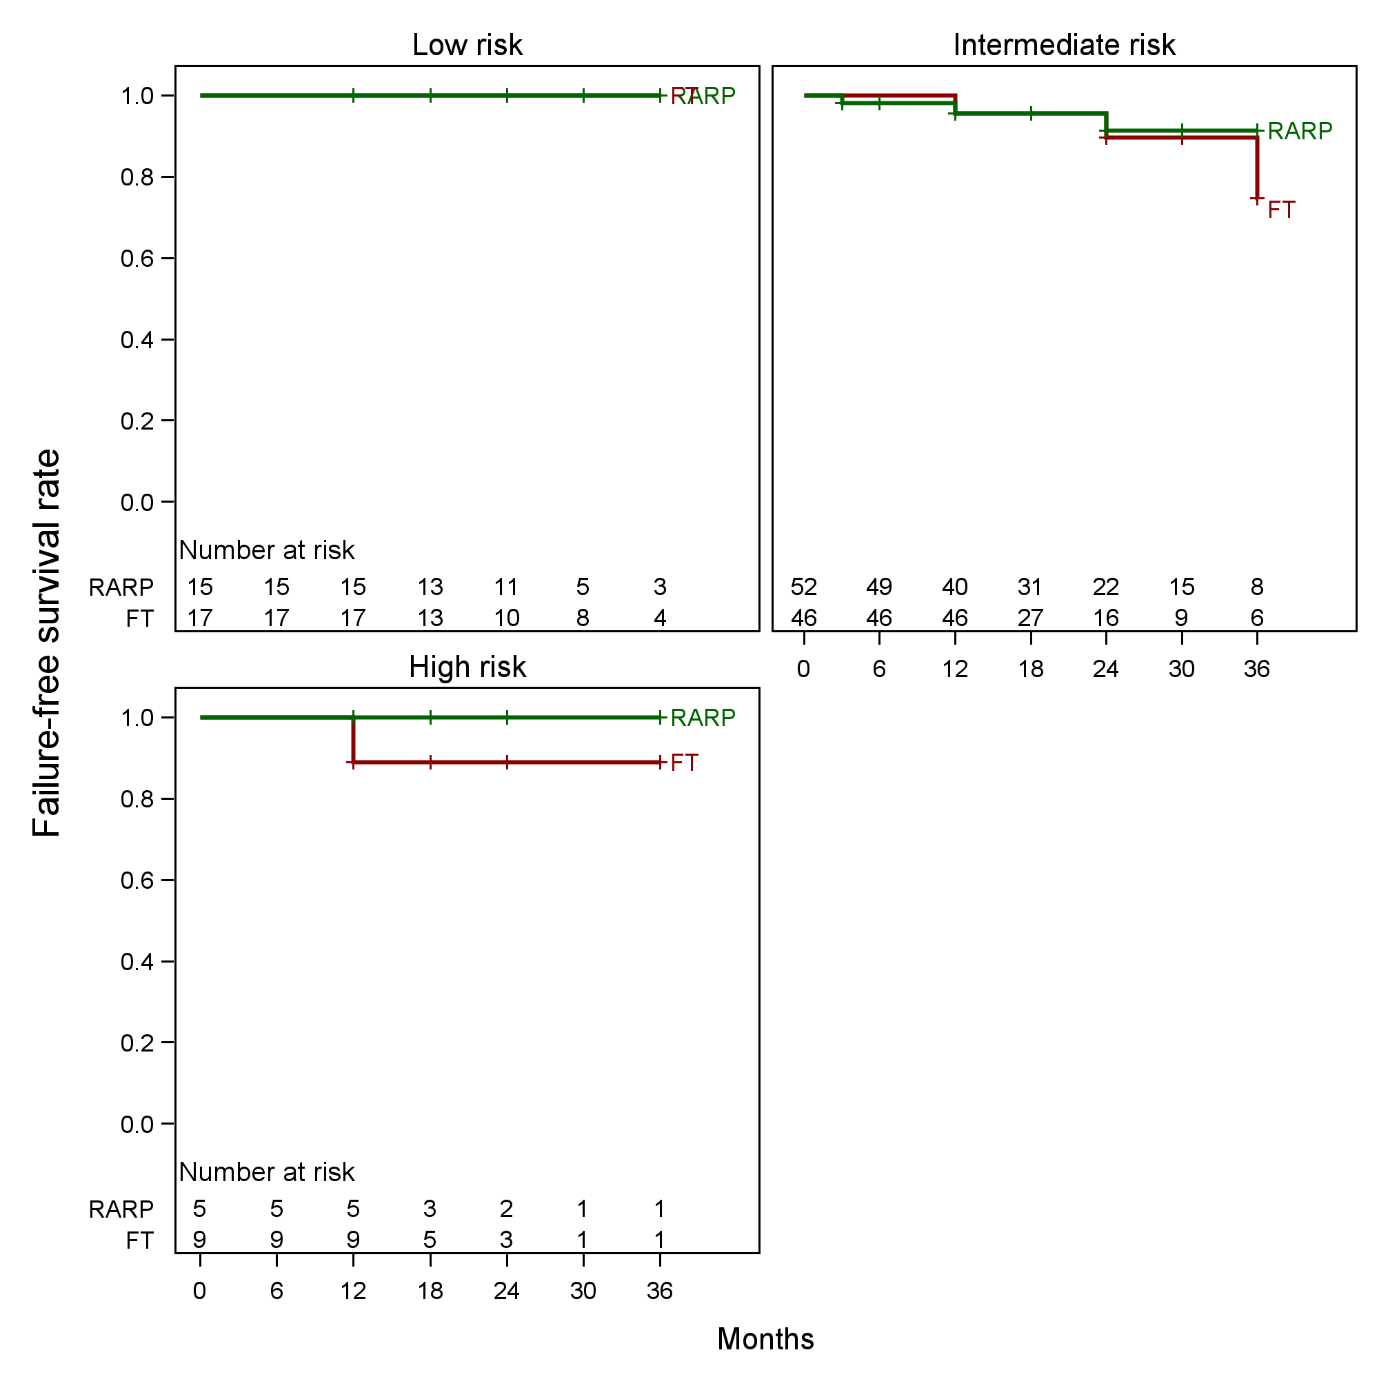


The 2-y failure-free survival (FFS) for the low-risk group was 100.0% for both the RARP and FT groups. FFS in the patients with intermediate-risk group were 91.3% (95%CI:73.6–97.3%) in the RARP group and 89.7% (95%CI:67.3–97.0%) in the FT group. FFS in the patients with high-risk group were 100.0% and 88.9% (95%CI:43.3–98.4%), respectively.

**Supplementary Figure 2. Kaplan-Meier curves for failure-free survival (Subgroups by Age classification)**


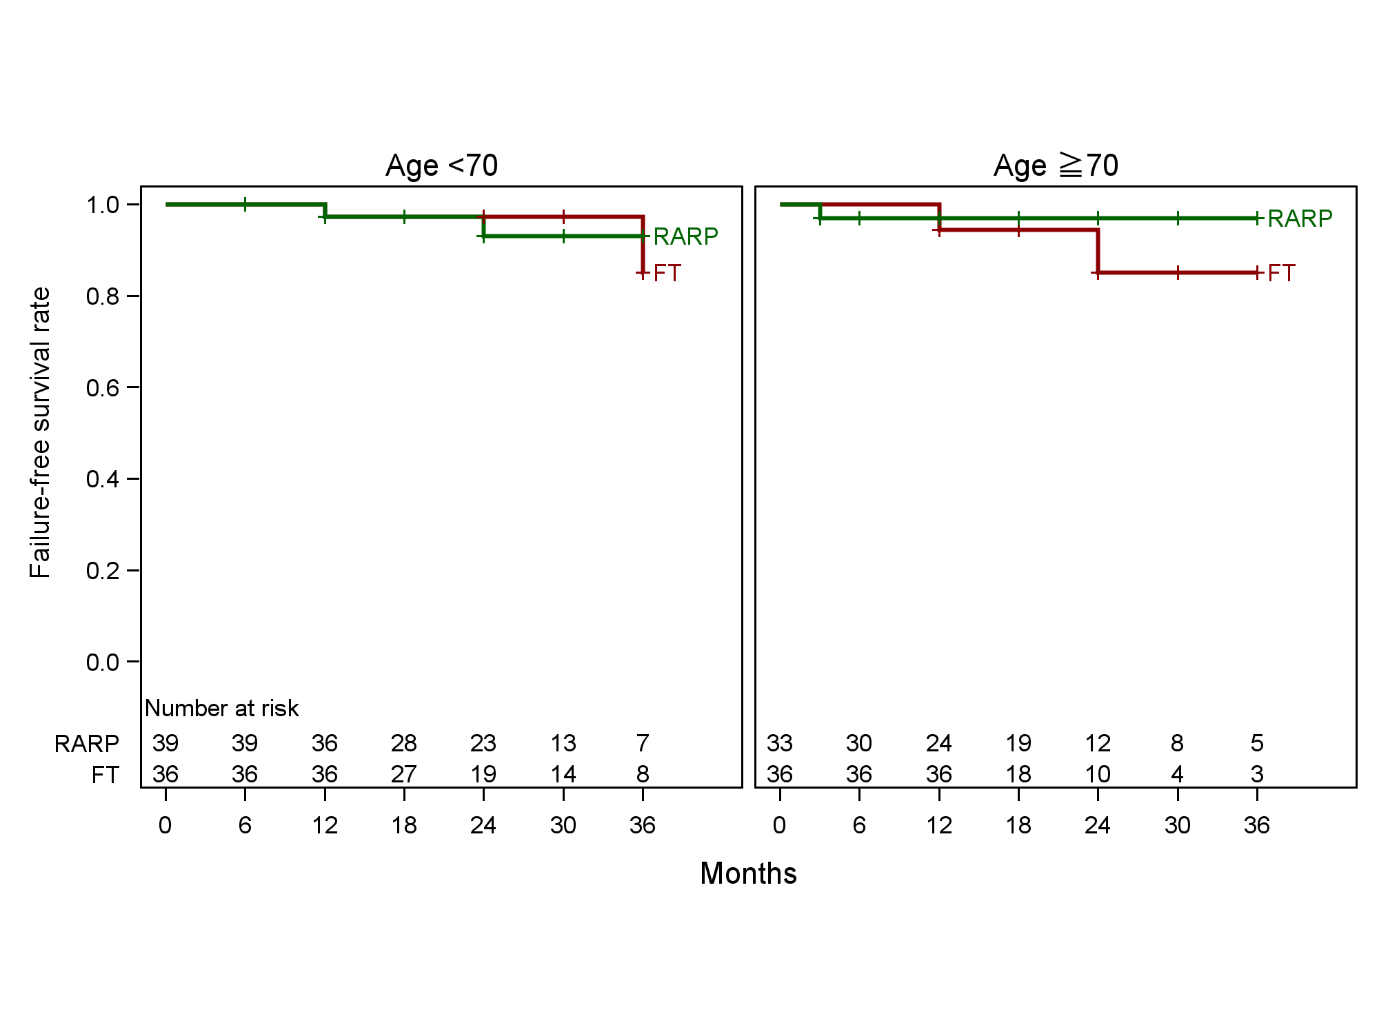


The 2-y failure-free survival (FFS) for the patients under 70 years of age were 93.0% (95%CI:74.0– 98.3%) for the RARP group and 97.2% (95%CI:81.9–99.6%) for the FT group; for the patients over 70 years of age, the rates were 97.0% (95%CI:80.4–99.6%) and 85.0% (95%CI:53.0–95.9%), respectively.

**Supplementary Figure 3. EPIC urinary function over time between treatment groups (Subgroups by D’Amico risk classification)**

**
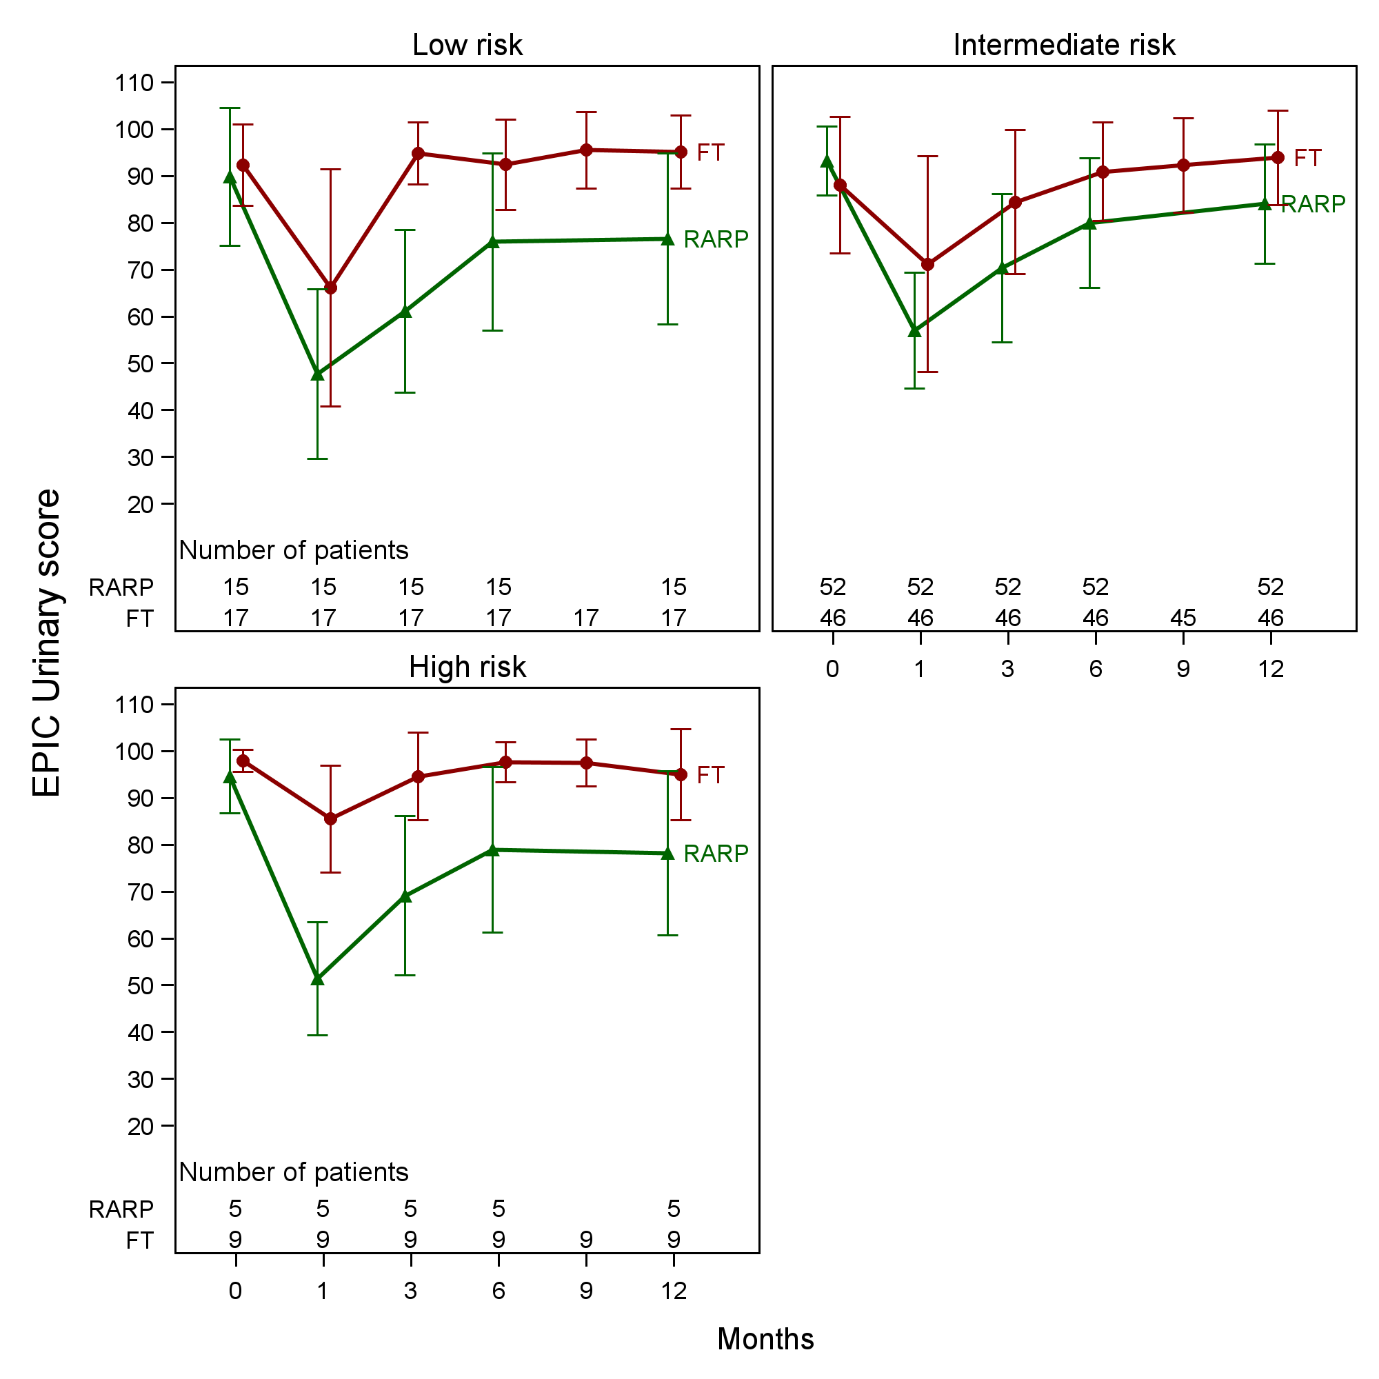
**

The points indicate mean values, and the error bars indicate standard deviations.

**Supplementary Figure 4. EPIC urinary function over time between treatment groups (Subgroups by Age classification)**


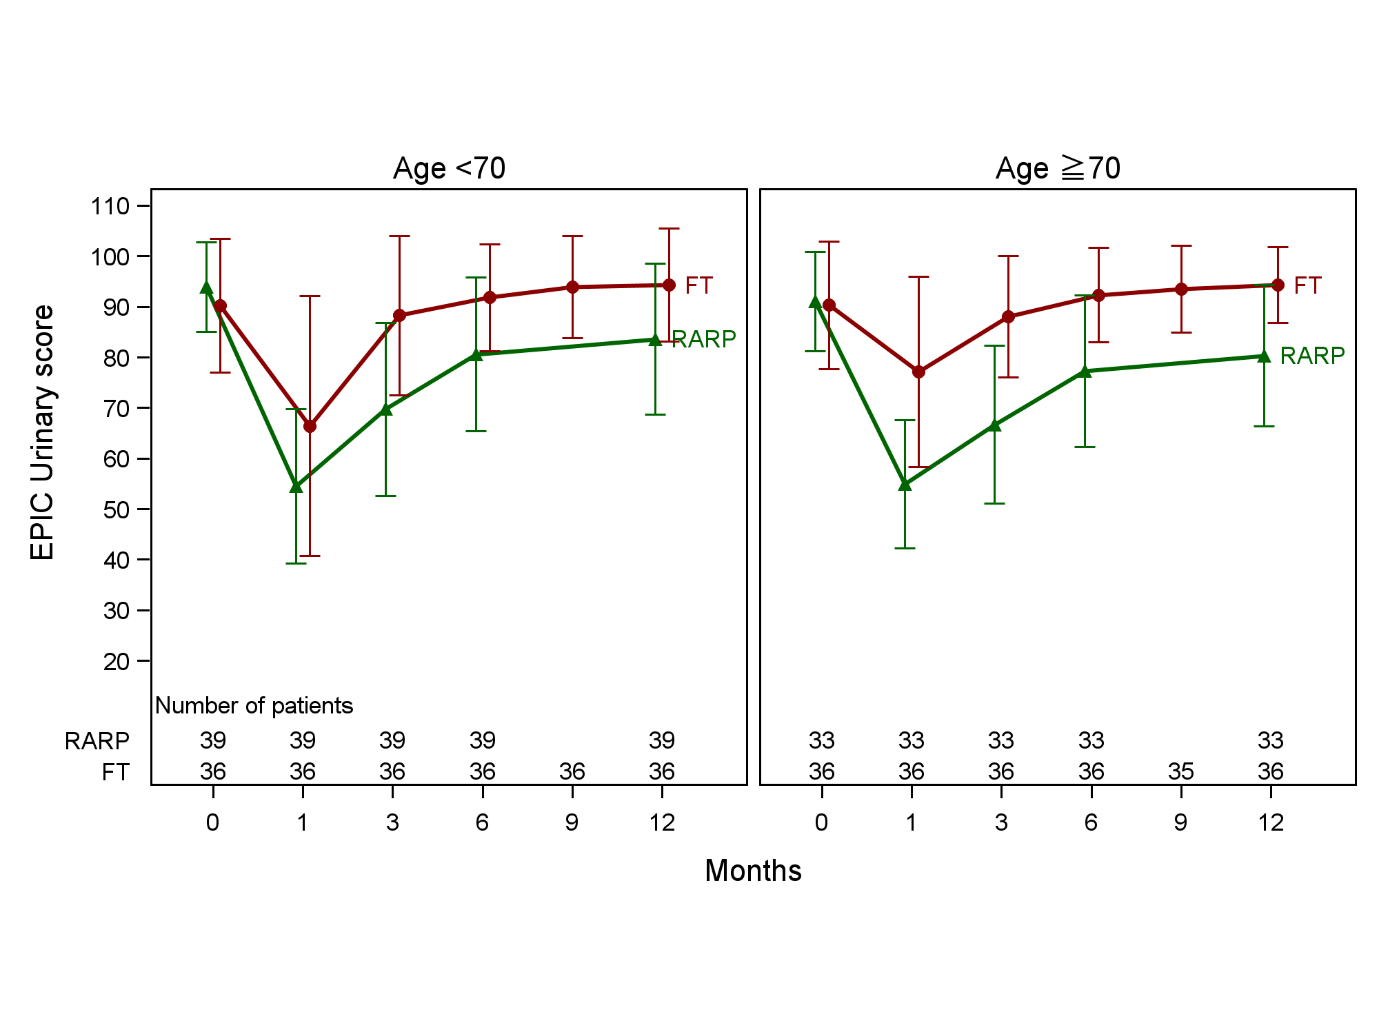


The points indicate mean values, and the error bars indicate standard deviations.

**Supplementary Figure 5. Proportion of win and loss by each outcome (overall and subgroups)**


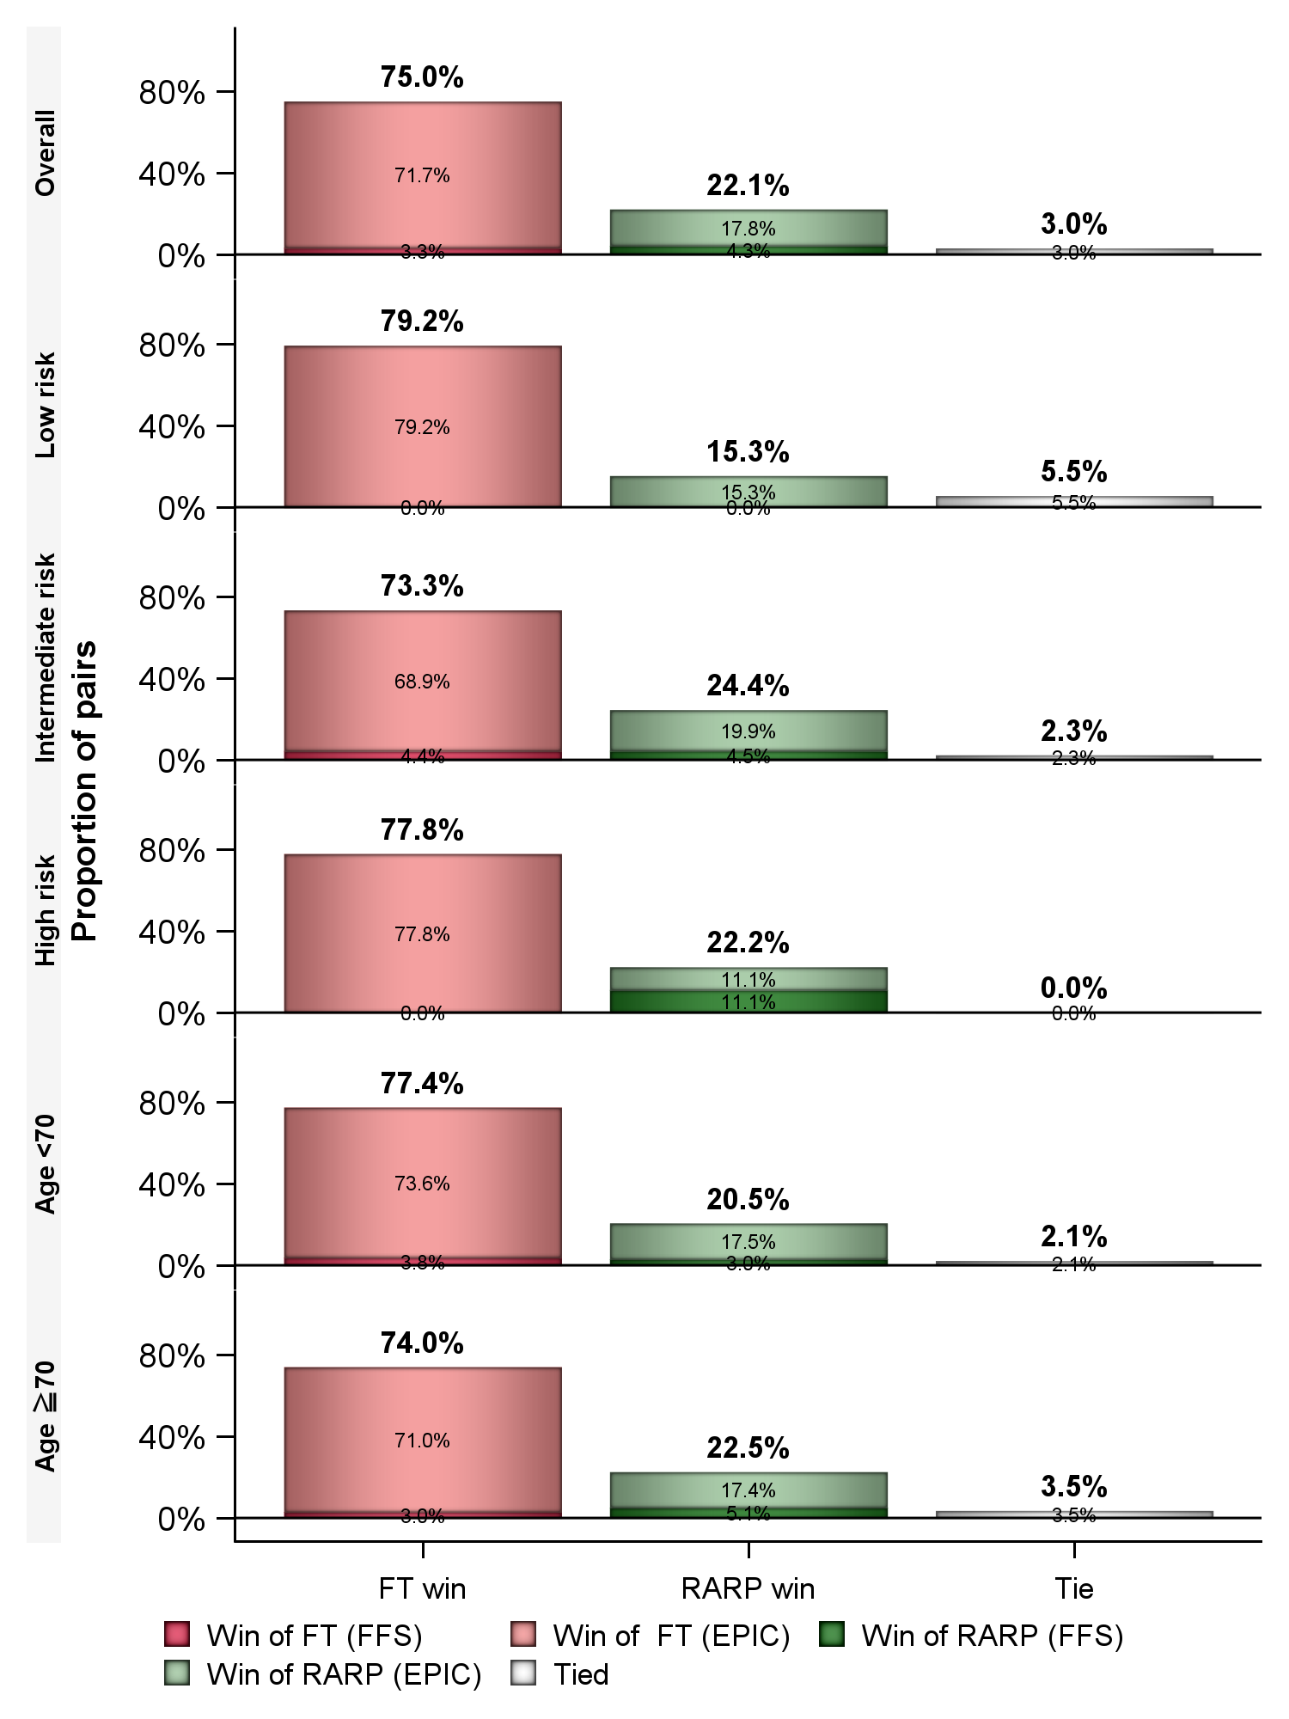


Proportion of win and loss by each outcome (overall and subgroups) was shown in Supplementary Figure 5.

Overall: The percentage of wins by treatment group for each component of the composite endpoint. The FT group showed that 75.0% of all pairs were judged as winning, but only 3.3% of them won on FFS, and 71.7% on the EPIC; the winning pairs in the FT and RARP groups were almost equal in FFS evaluation.

Low risk: The FT group showed that 79.2% of all pairs were judged as winning, but no pair won in the FFS evaluation. The same was true for the RARP group, where 15.3% of all pairs were judged as winning, but no pair won in the FFS evaluation.

Intermediate risk: The FT group showed that 73.3% of all pairs were judged as winning, 4.4% of them won on FFS and 68.9% on the EPIC; the winning pairs in the FT and RARP groups were almost equal in FFS evaluation.

High risk: The FT group showed that 77.8% of all pairs were judged as winning, but no pair won in the FFS evaluation. The RARP group won 11.1% of the pairs in the FFS and EPIC evaluations, respectively.

Age <70: The FT group showed that 77.4% of all pairs were judged as winning, but only 3.8% of them won on FFS, and 73.6% on the EPIC; the winning pairs in the FT and RARP groups were almost equal in FFS evaluation.

Age ≧70: The FT group showed that 74.0% of all pairs were judged as winning, but only 3.0% of them won on FFS, and 71.0% on the EPIC. The RARP group showed that 22.5% of all pairs were judged as winning, 5.1% of them won on FFS, and 17.4% on the EPIC.
